# Supplementary material for: Targeting AnxA1/Formyl Peptide Receptor 2 Pathway Affords Protection against Pathological Thrombo-Inflammation
Source: Cells. 2020 Nov 13;9(11):2473. doi: 10.3390/cells9112473 (PMC7697101; doi:10.3390/cells9112473)
Supplement: Supplementary file 1 [file cells-09-02473-s001.pdf]

## A Arterioles

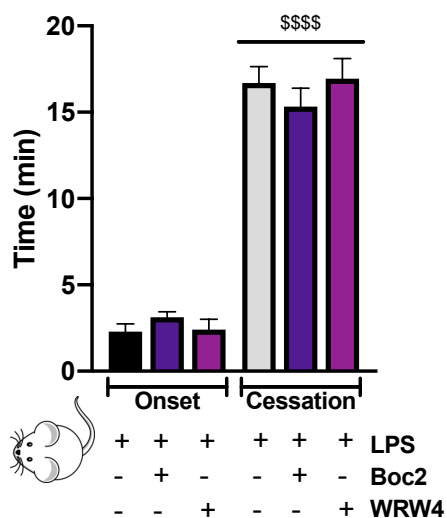

## B Venules

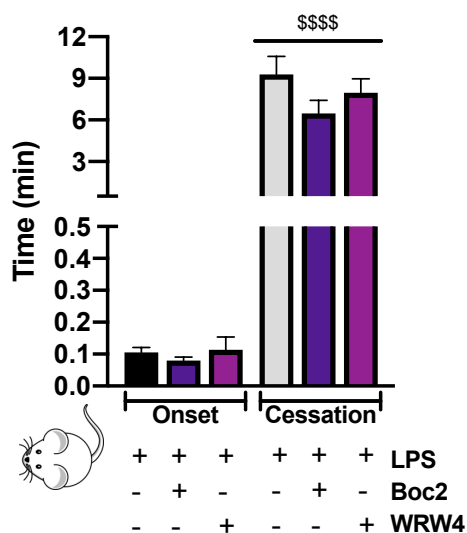

**Figure S1. Effect of FPR antagonists.** Mice (C57BL/6) were subjected to vehicle LPS (10  $\mu$ g/mouse) for 2h and treated with vehicle (saline), pan FPR antagonist Boc2 (10  $\mu$ g/mouse) or FPR2/ALX antagonist WRW4 (55  $\mu$ g/mouse) 20 minutes prior to light/dye-induced thrombus formation, with time of onset and blood flow cessation times recorded for cerebral A) arterioles and B) venules. Data are means  $\pm$  SEM of 5-6 mice/group. \*\*\*\* $p$  < 0.0001 vs. same group for onset time.

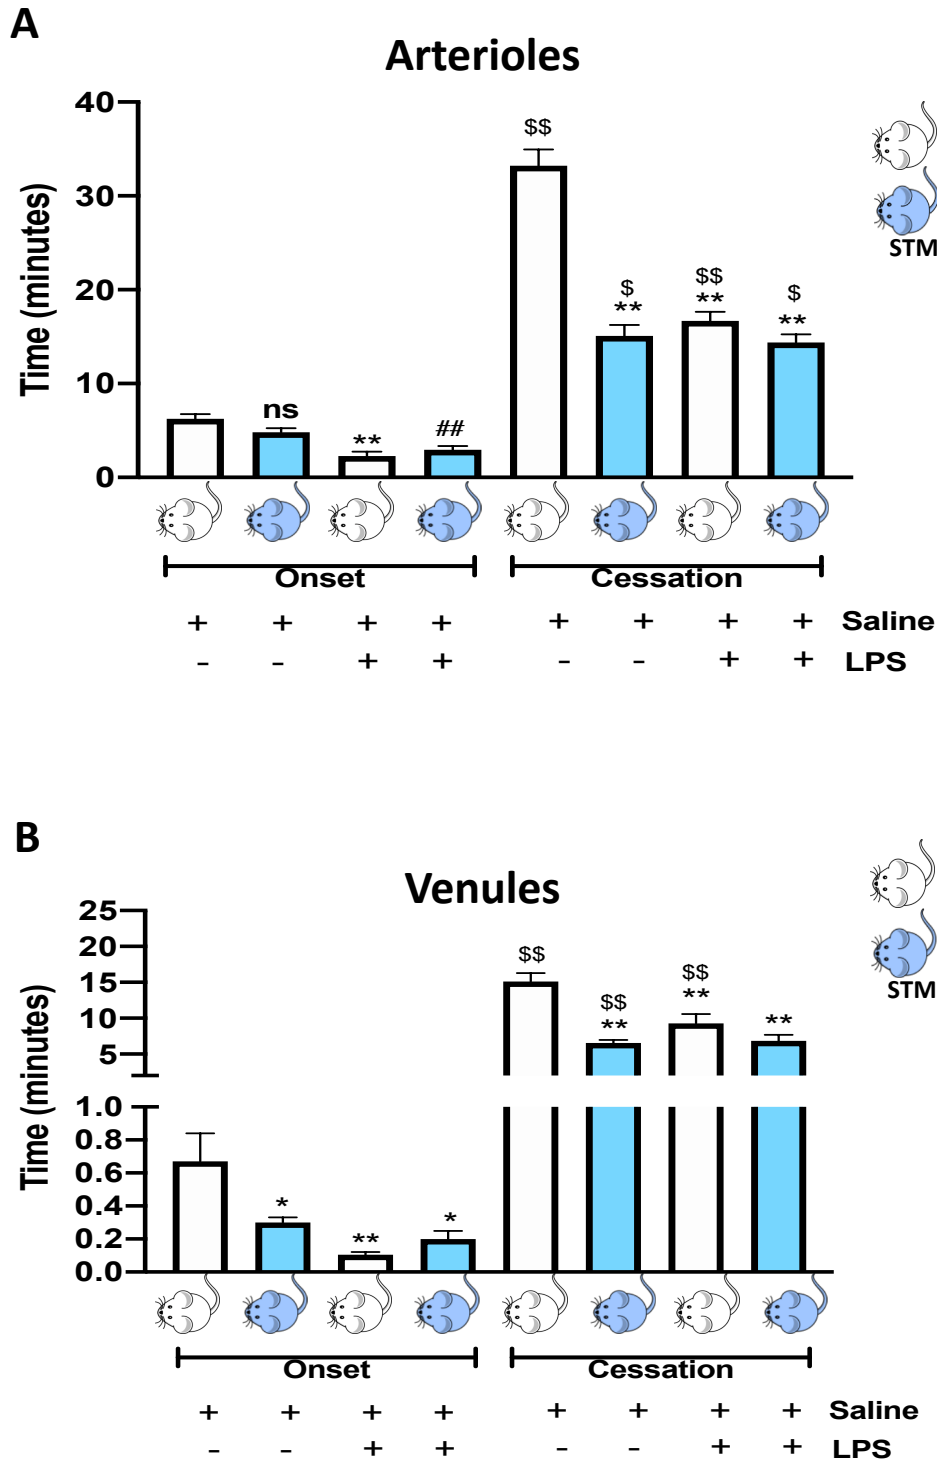

**Figure S2.** Onset and blood flow cessation times in mice with/without endotoxaemia. C57BL/6 mice or sickle cell transgenic mice (STM) were subjected to vehicle (saline) or LPS (0.4 mg/kg) for 2h. A cranial window was performed, and FITC-dextran injected (10 mg/kg of 5%). Mice were then subjected to intravital microscopy and light/dye-induced thrombus formation, with time of onset and blood flow cessation times recorded for cerebral (A) arterioles and (B) venules. Data are means  $\pm$  SEM of 5-6 mice/group. \* $p$  < 0.05, \*\* $p$  < 0.01 vs. C57BL/6 saline group. ## $p$  < 0.01 vs. STM saline group. \$ $p$  < 0.05, \$\$ $p$  < 0.0001 vs. same group for onset time.

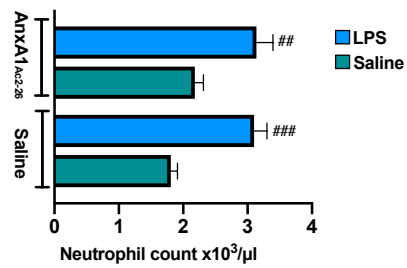

**Figure S3. AnxA1<sub>Ac2-26</sub> did not affect neutrophil counts in LPS-treated mice.** Peripheral blood neutrophil counts were assessed following saline (vehicle) or AnxA1<sub>Ac2-26</sub> (4 mg/kg) administration for 20 minutes following 2h saline (vehicle) or LPS (0.4 mg/kg) administration. Data are means  $\pm$  SEM of 5-6 mice/group. \*\*  $p < 0.01$ , \*\*\*  $p < 0.001$  vs. LPS vehicle (saline).

## A Arterioles

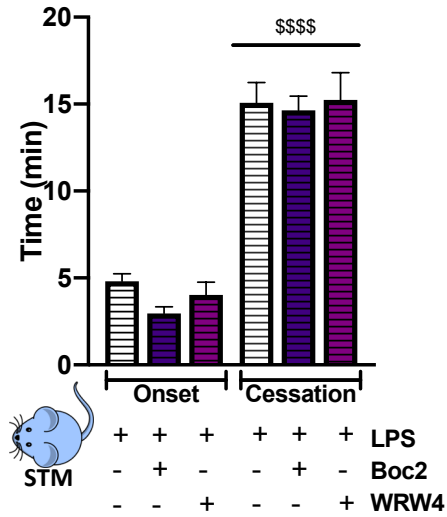

## B Venules

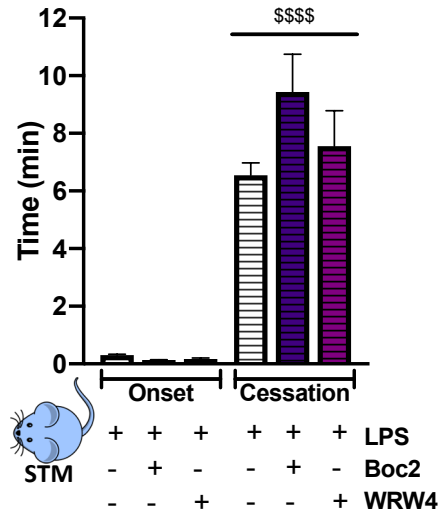

**Figure S4. Effect of FPR antagonists in sickle cell transgenic mice (STM).** STM were subjected to vehicle LPS (10  $\mu$ g/mouse) for 2h and treated with vehicle (saline), pan FPR antagonist Boc2 (10  $\mu$ g/mouse) or FPR2/ALX antagonist WRW4 (55  $\mu$ g/mouse) 20 min prior to light/dye-induced thrombus formation, with time of onset and blood flow cessation times recorded for cerebral A) arterioles and B) venules. Data are means  $\pm$  SEM of 5-6 mice/group.  $$$$$p < 0.0001$  vs. same group for onset time.
